# Supplementary material
Source: publisher figshare collection journal article supplement (https://acs.figshare.com/ndownloader/files/9190093)
Supplement: Supplementary file 1 [file 9190093]

## Supporting Information

### **Mechanical Behavior of Molecular Crystals Induced by Combination of Photochromic Reaction and Reversible Single-Crystal-to-Single-Crystal Phase Transition**

**Daichi Kitagawa, Kaito Kawasaki, Rika Tanaka, and Seiya Kobatake\***

*Department of Applied Chemistry, Graduate School of Engineering, Osaka City University, 3-3-138 Sugimoto, Sumiyoshi-ku, Osaka 558-8585, Japan.*

\*E-mail: kobatake@a-chem.eng.osaka-cu.ac.jp

## Contents

**Figure S1.** Typical photomechanical behavior of a diarylethene crystal of 1,2-bis(2-methyl-5-(4-(1-naphthoyloxymethyl)phenyl)-3-thienyl)perfluorocyclopentene.

**Figure S2.** Photomechanical behavior of crystal **1a** upon visible light irradiation after UV light irradiation.

**Figure S3.** Reversibility test of initial bending behavior.

**Figure S4.** Thermosalient effect of crystal **1a**. The crystal suddenly jumped at 36.5 °C

**Table S1.** Crystallographic data for crystal **1a** at various temperatures.

**Video S1.** Photochromism of crystal **1a** upon UV light irradiation. The movie is taken in the real time.

**Video S2.** Photoinduced bending behavior of crystal **1a**. The movie is taken in the real time.

**Video S3.** Thermosalient effect of crystal **1a**. The crystal suddenly jumped at 36.5 °C. The movie is fast-forwarded as much as twice.

**Video S4.** Direct observation of change in crystal length upon heating from 15 °C to 45 °C at a rate of 2 °C min<sup>-1</sup>. The movie is fast-forwarded as much as twice.

**Video S5.** Direct observation of change in crystal length upon cooling from 45 °C to 15 °C at a rate of 2 °C min<sup>-1</sup>. The movie is fast-forwarded as much as twice.

**Video S6.** Photomechanical behavior of crystal **1a** at 25 °C. The movie is taken in the real time.

**Video S7.** Photomechanical behavior of crystal **1a** at 66 °C. The movie is taken in the real time.

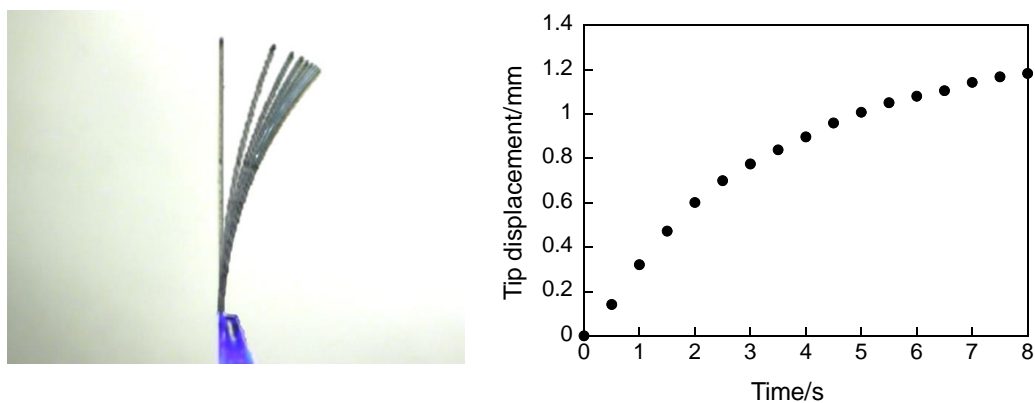

**Figure S1.** Typical photomechanical behavior of a diarylethene crystal of 1,2-bis(2-methyl-5-(4-(1-naphthoyloxymethyl)phenyl)-3-thienyl)perfluorocyclopentene.<sup>S1</sup>

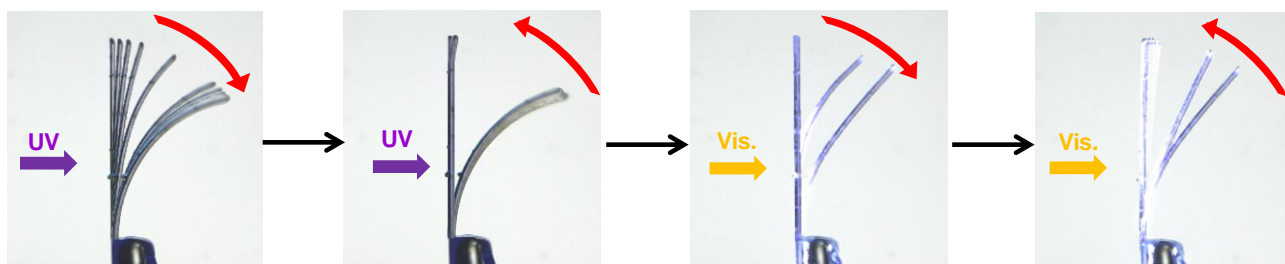

**Figure S2.** Photomechanical behavior of crystal **1a** upon visible light irradiation after UV light irradiation.

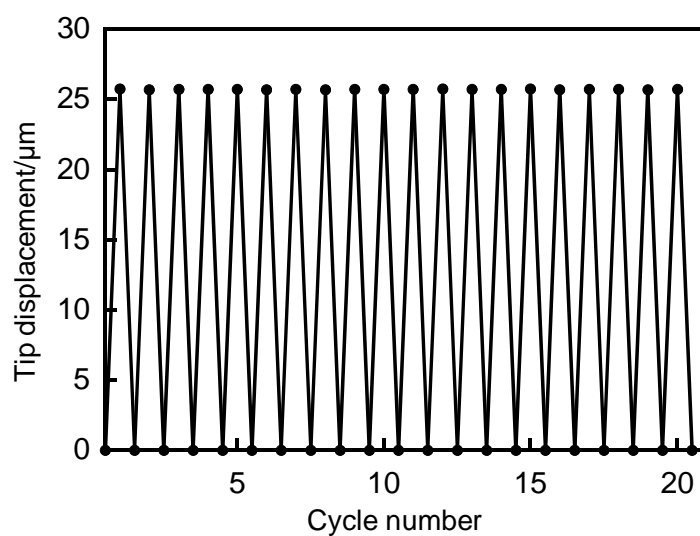

**Figure S3.** Reversibility test of initial bending behavior.

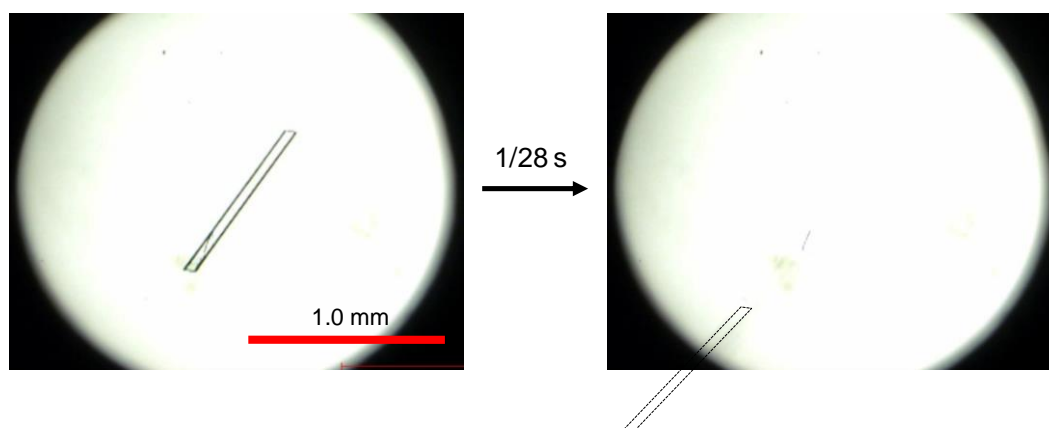

**Figure S4.** Thermosalient effect of crystal **1a**. The crystal suddenly jumped at 36.5 °C. The crystal jumped more than 1.25 mm distance in 1/28 s. The speed of jumping was estimated to be more than 35 mm s<sup>-1</sup>.

**Table S1.** Crystallographic data for crystal **1a** at various temperatures.

|                              |                                                            |          |          |                 |                 |
|------------------------------|------------------------------------------------------------|----------|----------|-----------------|-----------------|
| Formula                      | $\text{C}_{43}\text{H}_{50}\text{F}_6\text{O}_2\text{S}_2$ |          |          |                 |                 |
| Formula weight               | 776.95                                                     |          |          |                 |                 |
| Temperature/K                | 213.15                                                     | 233.15   | 253.15   | 273.15          | 313.15          |
| Crystal system               | triclinic                                                  |          |          |                 |                 |
| Space group                  | $P\bar{1}$                                                 |          |          |                 |                 |
| $a / \text{\AA}$             | 6.1128                                                     | 6.1364   | 6.1709   | 6.193 (5)       | 6.389 (5)       |
| $b / \text{\AA}$             | 17.7692                                                    | 17.7267  | 17.6559  | 17.569 (14)     | 17.125 (16)     |
| $c / \text{\AA}$             | 19.6327                                                    | 19.6221  | 19.6053  | 19.605 (15)     | 20.105 (18)     |
| $\alpha / ^\circ$            | 108.0207                                                   | 107.9132 | 107.8828 | 107.797 (5)     | 108.813 (4)     |
| $\beta / ^\circ$             | 89.4390                                                    | 89.7827  | 90.0253  | 90.469 (11)     | 90.502 (14)     |
| $\gamma / ^\circ$            | 99.3331                                                    | 99.5297  | 99.7012  | 100.043 (10)    | 102.091 (12)    |
| Volume / $\text{\AA}^3$      | 1998.810                                                   | 1999.813 | 2000.679 | 1996 (3)        | 2029 (3)        |
| $Z$                          | —                                                          | —        | —        | 2               | 2               |
| Density / $\text{g cm}^{-3}$ | —                                                          | —        | —        | 1.293           | 1.272           |
| Goodness-of-fit on $F^2$     | —                                                          | —        | —        | 1.064           | 1.130           |
| $R(I > 2\sigma(I))$          | —                                                          | —        | —        | $R_1 = 0.0763$  | $R_1 = 0.0898$  |
| $R(\text{all data})$         | —                                                          | —        | —        | $wR_2 = 0.2223$ | $wR_2 = 0.2453$ |
| CCDC No.                     | —                                                          | —        | —        | 1540686         | 1540687         |

## Estimation of the conversion in the crystal surface when the phase transition takes place at room temperature

In previous work, the change of unit cell parameter along to long axis of crystal by the photoisomerization of diarylethene molecules was determined to be 0.24% when the conversion of diarylethene molecules from the open-ring isomer to the closed-ring isomer is 7%.<sup>S2</sup> From this relationship, in the present work, we estimated the conversion in the crystal surface when the phase transition takes place at room temperature. The crystal shape just before the phase transition takes place at room temperature upon UV irradiation is depicted below.

$$\text{Expansion ratio (\%)} = \left( \frac{2\pi(r + d) \times \theta/360}{2\pi r \times \theta/360} - 1 \right) \times 100$$
$$= \left( \frac{r + d}{r} - 1 \right) \times 100$$

Experimental data

| Sample No. | $d/\mu\text{m}$ | $r/\mu\text{m}$ | Expansion ratio (%) |
|------------|-----------------|-----------------|---------------------|
| 1          | 6               | 618             | 0.97                |
| 2          | 8               | 470             | 1.7                 |
| 3          | 9               | 600             | 1.5                 |
| Average    | 7.7             | 563             | 1.4                 |

The expansion ratio in length of crystal surface can be calculated by the above equation. As a result, the expansion ratio in length of crystal surface when the phase transition takes place was estimated to be 1.4%. From this value, the conversion in the crystal surface when the phase transition takes place at room temperature was estimated to be 40%.

## Reference

- S1.** Kitagawa, D.; Kobatake, S. Crystal Thickness Dependence of Photoinduced Crystal Bending of 1,2-Bis(2-methyl-5-(4-(1-naphthoyloxymethyl)phenyl)-3-thienyl)perfluorocyclopentene. *J. Phys. Chem. C* **2013**, *117*, 20887-20892.
- S2.** Kobatake, S.; Takami, S.; Muto, H.; Ishikawa, T.; Irie, M. Rapid and Reversible Shape Changes of Molecular Crystals on Photoirradiation. *Nature* **2007**, *446*, 778-781.
